# Supplementary material for: Auranofin Induces Lethality Driven by Reactive Oxygen Species in High-Grade Serous Ovarian Cancer Cells
Source: MDPI journal article supplement (doi:10.3390/cancers15215136), 2023-10-25
Supplement: s1 [file s1]

Supplementary Figure S1: Induction of apoptosis by auranofin is not prevented by caspase inhibition

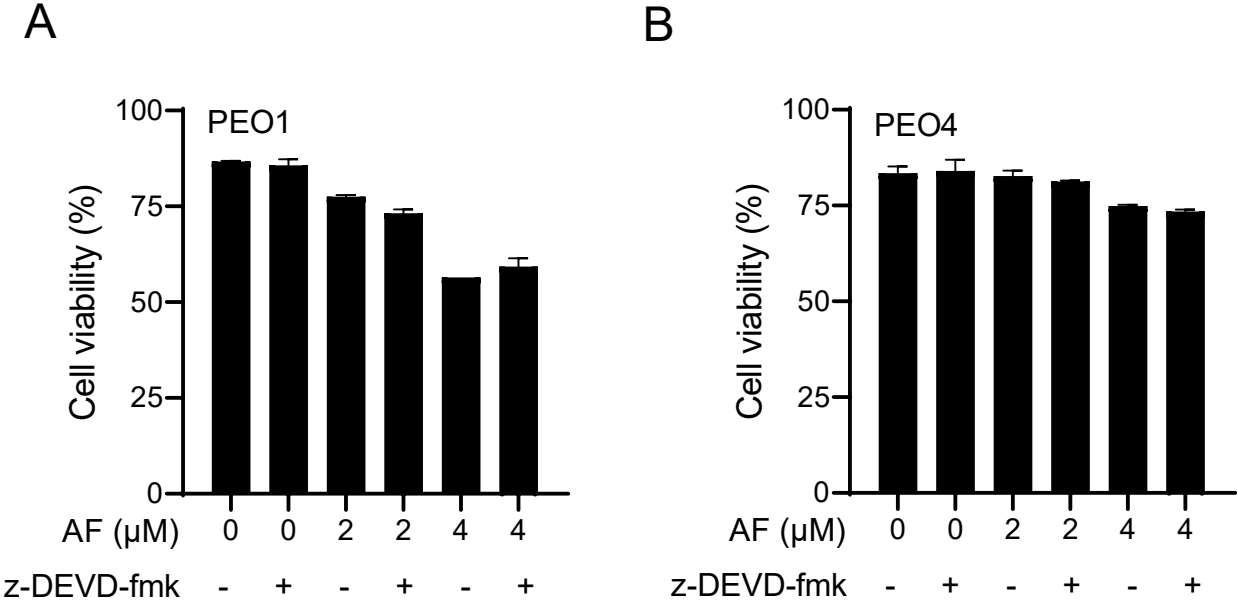

Supplementary Figure S2: Auranofin induces accumulation of polyubiquitinated proteins, an effect prevented by NAC

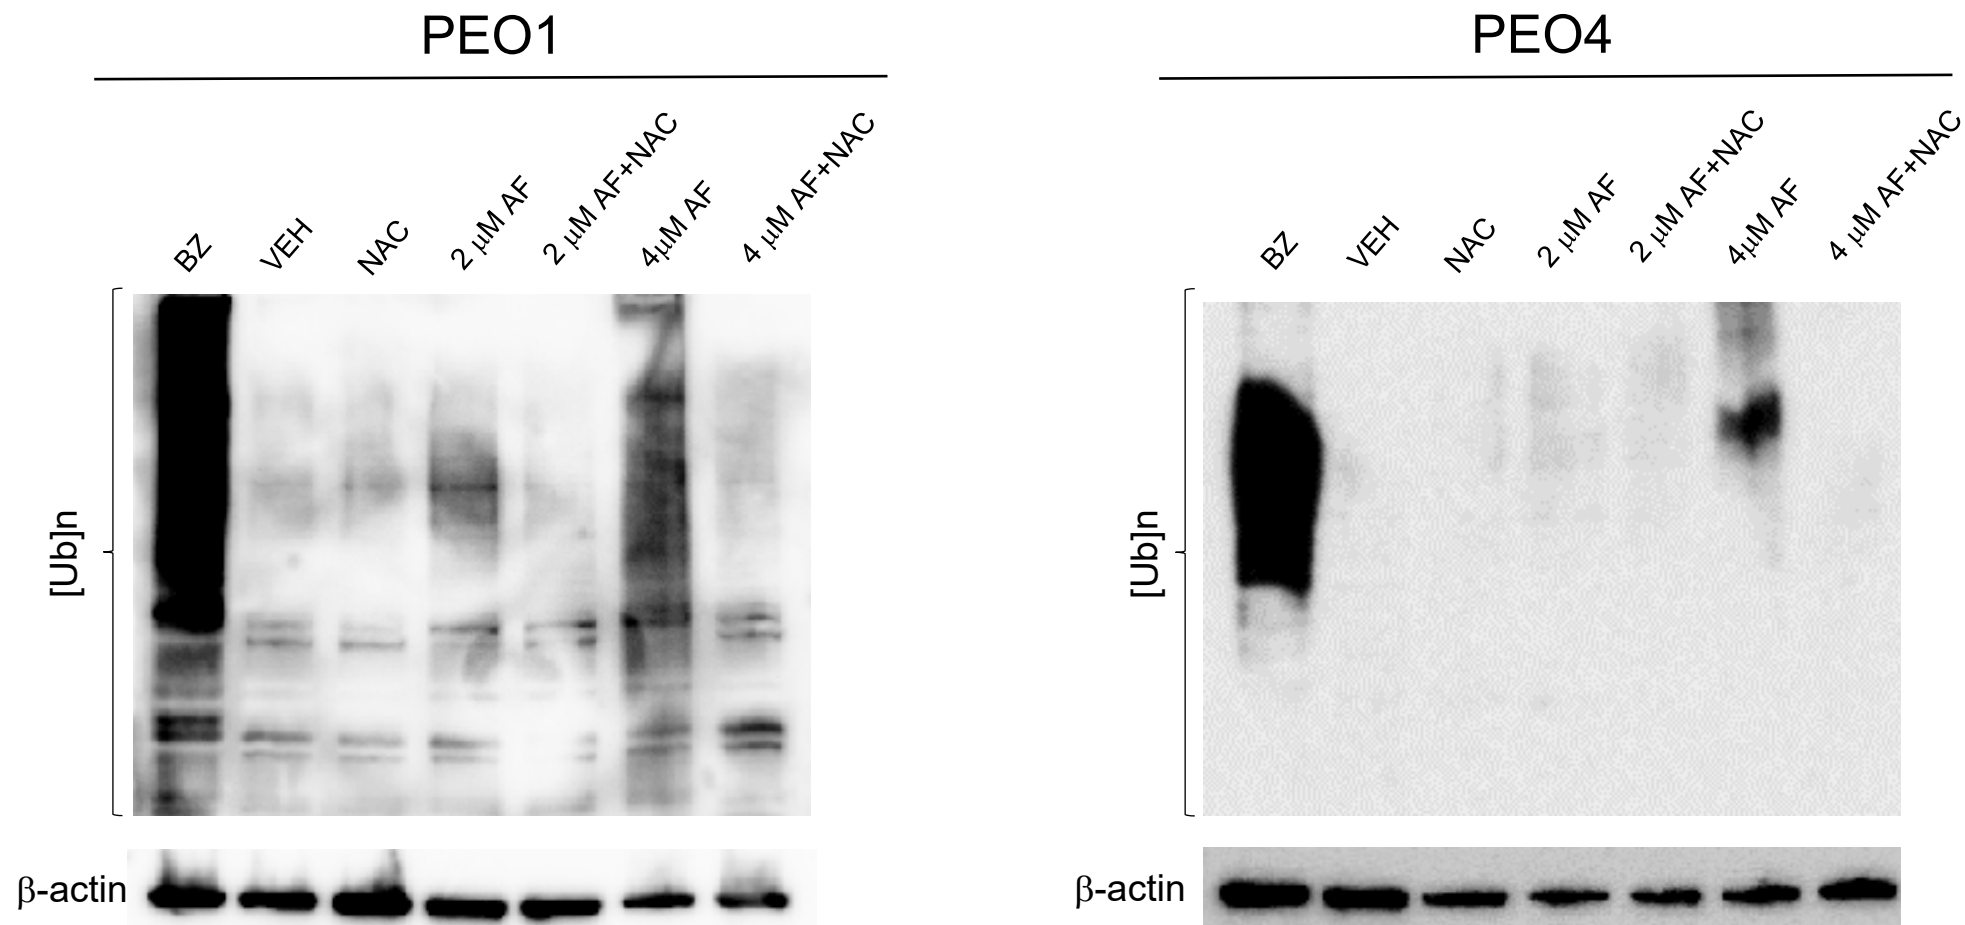

Supplementary Figure S3: Original membranes containing detailed information of the uncropped immunoblot images

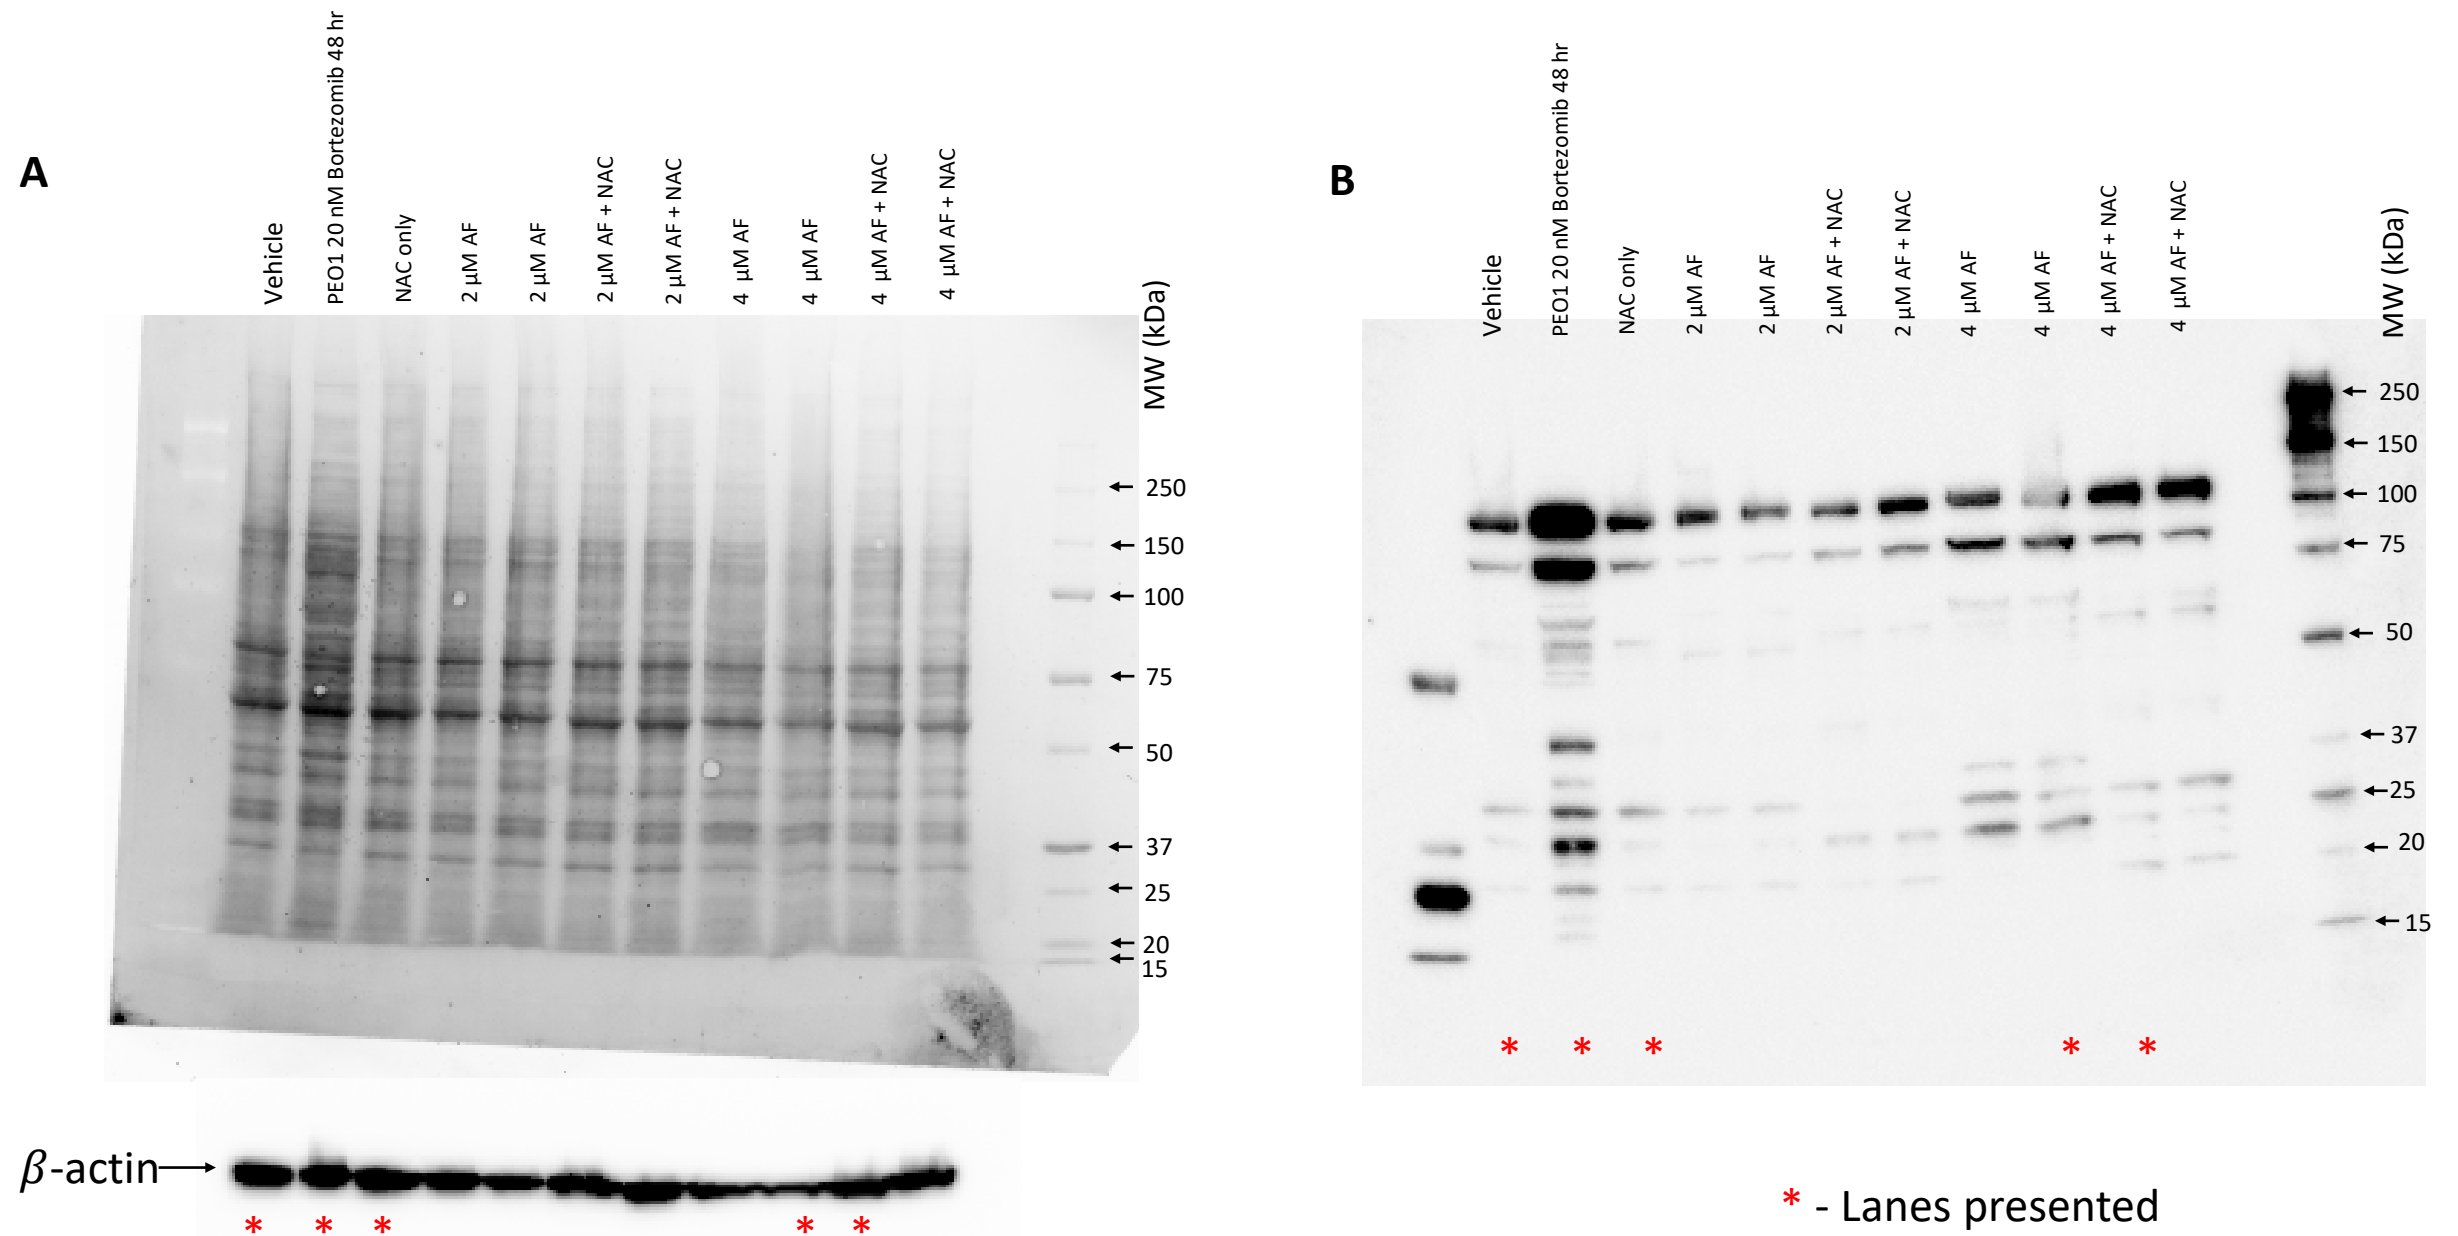

**Blot S1.** PEO1 cells were treated with the indicated concentrations of AF with or without the presence of 5 mM NAC for 24 hr. PEO1 cells treated with 20 nM bortezomib (Bz) for 48 hr were used as a positive control. Extracted proteins from the samples were run for 35 min at 200V on TGX stain free fast cast acrylamide gel (10 %). After the run, the gel was activated by UV light, and the proteins on the gel were transferred for 7 min using TransBlot Turbo. After the transfer, total protein load was visualized in the unstained membrane using BioRad ChemiDoc imager (A). After 1 h of blocking with 5% non-fat dry milk, the blot was incubated with anti-PARP antibody overnight at 4°C. (B). The blot was then incubated for  $\beta$ -actin (A). Data from this blot was presented in Figure 7B.

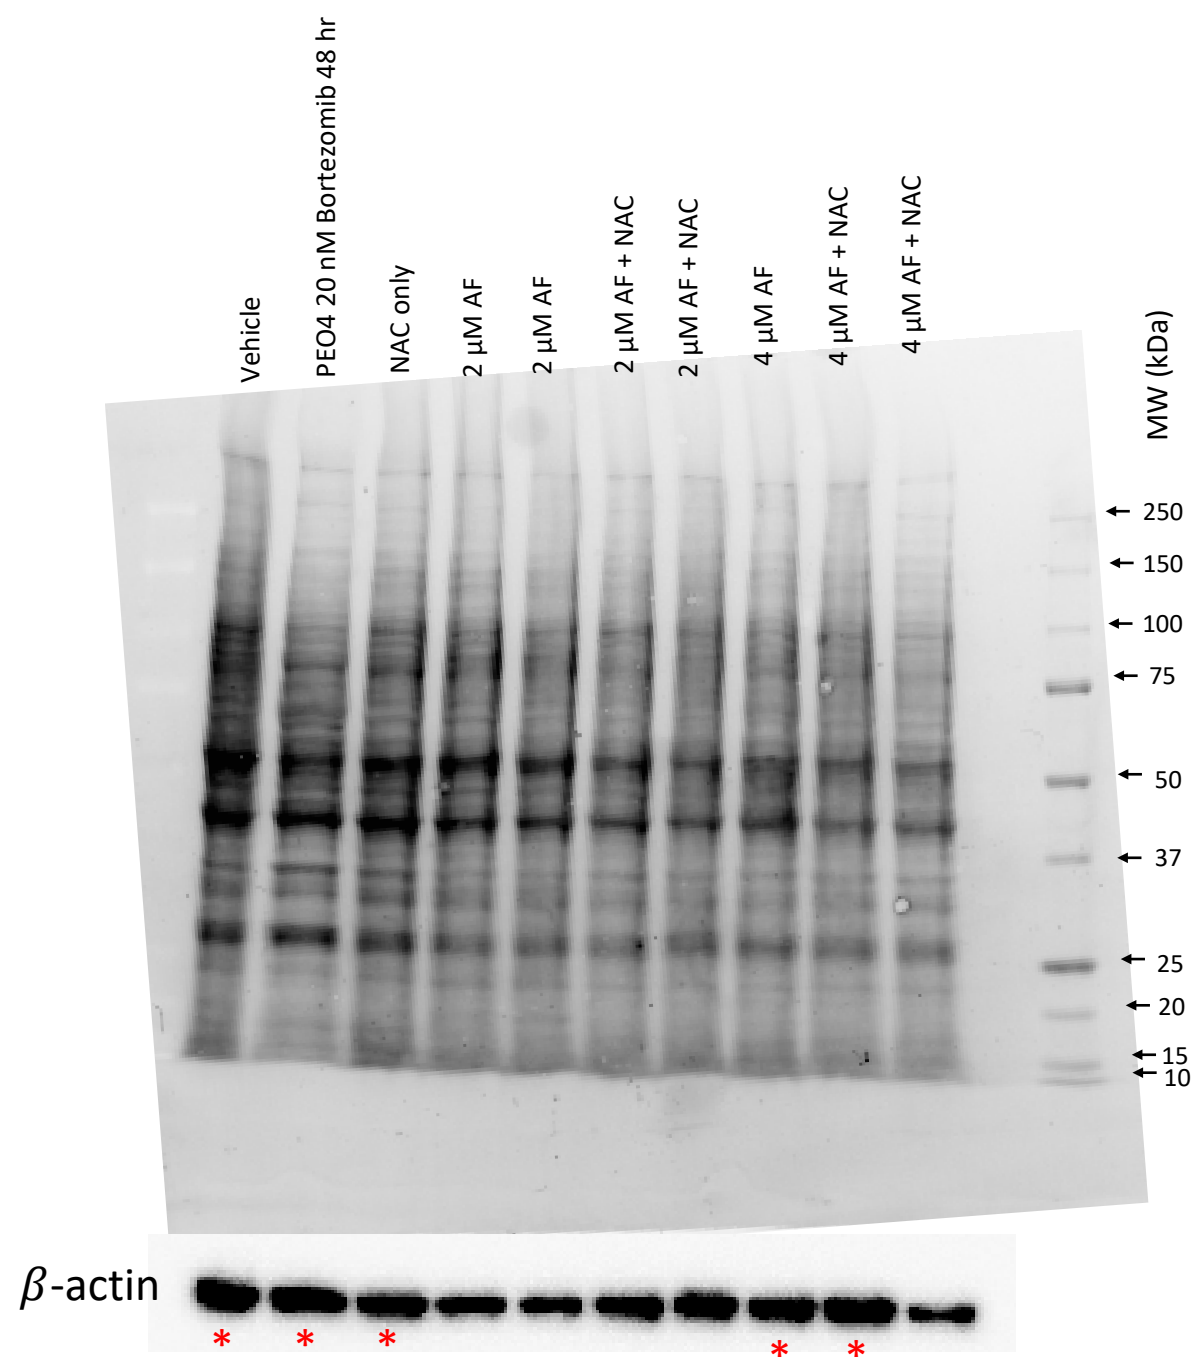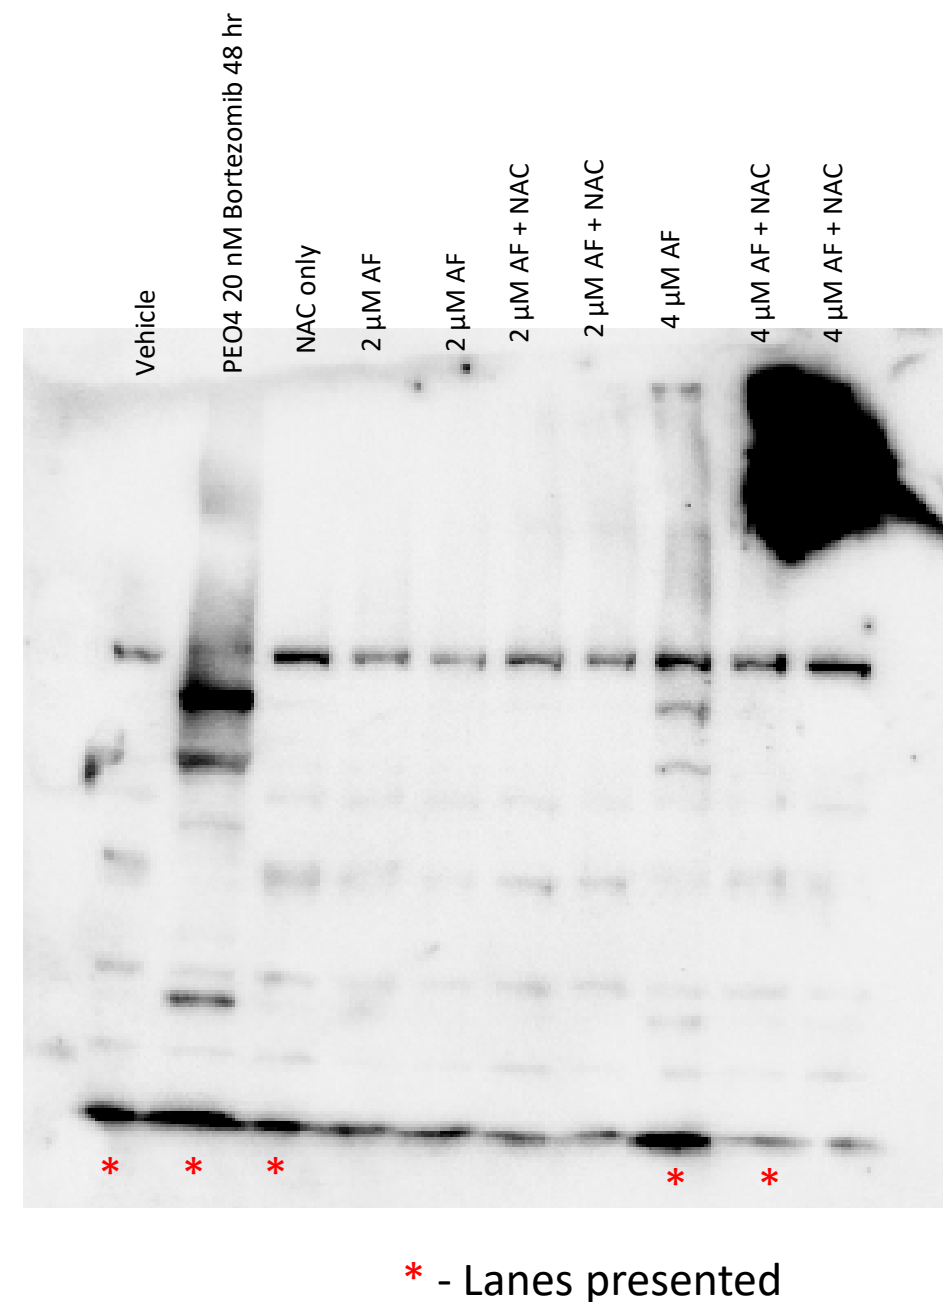

**Blot S2.** PEO4 cells were treated with the indicated concentrations of AF with or without the presence of 5 mM NAC for 24 hr. PEO4 cells treated with 20 nM bortezomib (Bz) for 48 hr were used as a positive control. Extracted proteins from the samples were run for 35 min at 200V on TGX stain free fast cast acrylamide gel (10 %). After the run, the gel was activated by UV light, and the proteins on the gel were transferred for 7 min using TransBlot Turbo. After the transfer, total protein load was visualized in the unstained membrane using BioRad ChemiDoc imager (A). After 1 h of blocking with 5% non-fat dry milk, the blot was incubated with anti-PARP antibody overnight at 4°C. (B). The blot was then incubated for  $\beta$ -actin (A). Data from this blot was presented in Figure 7D.

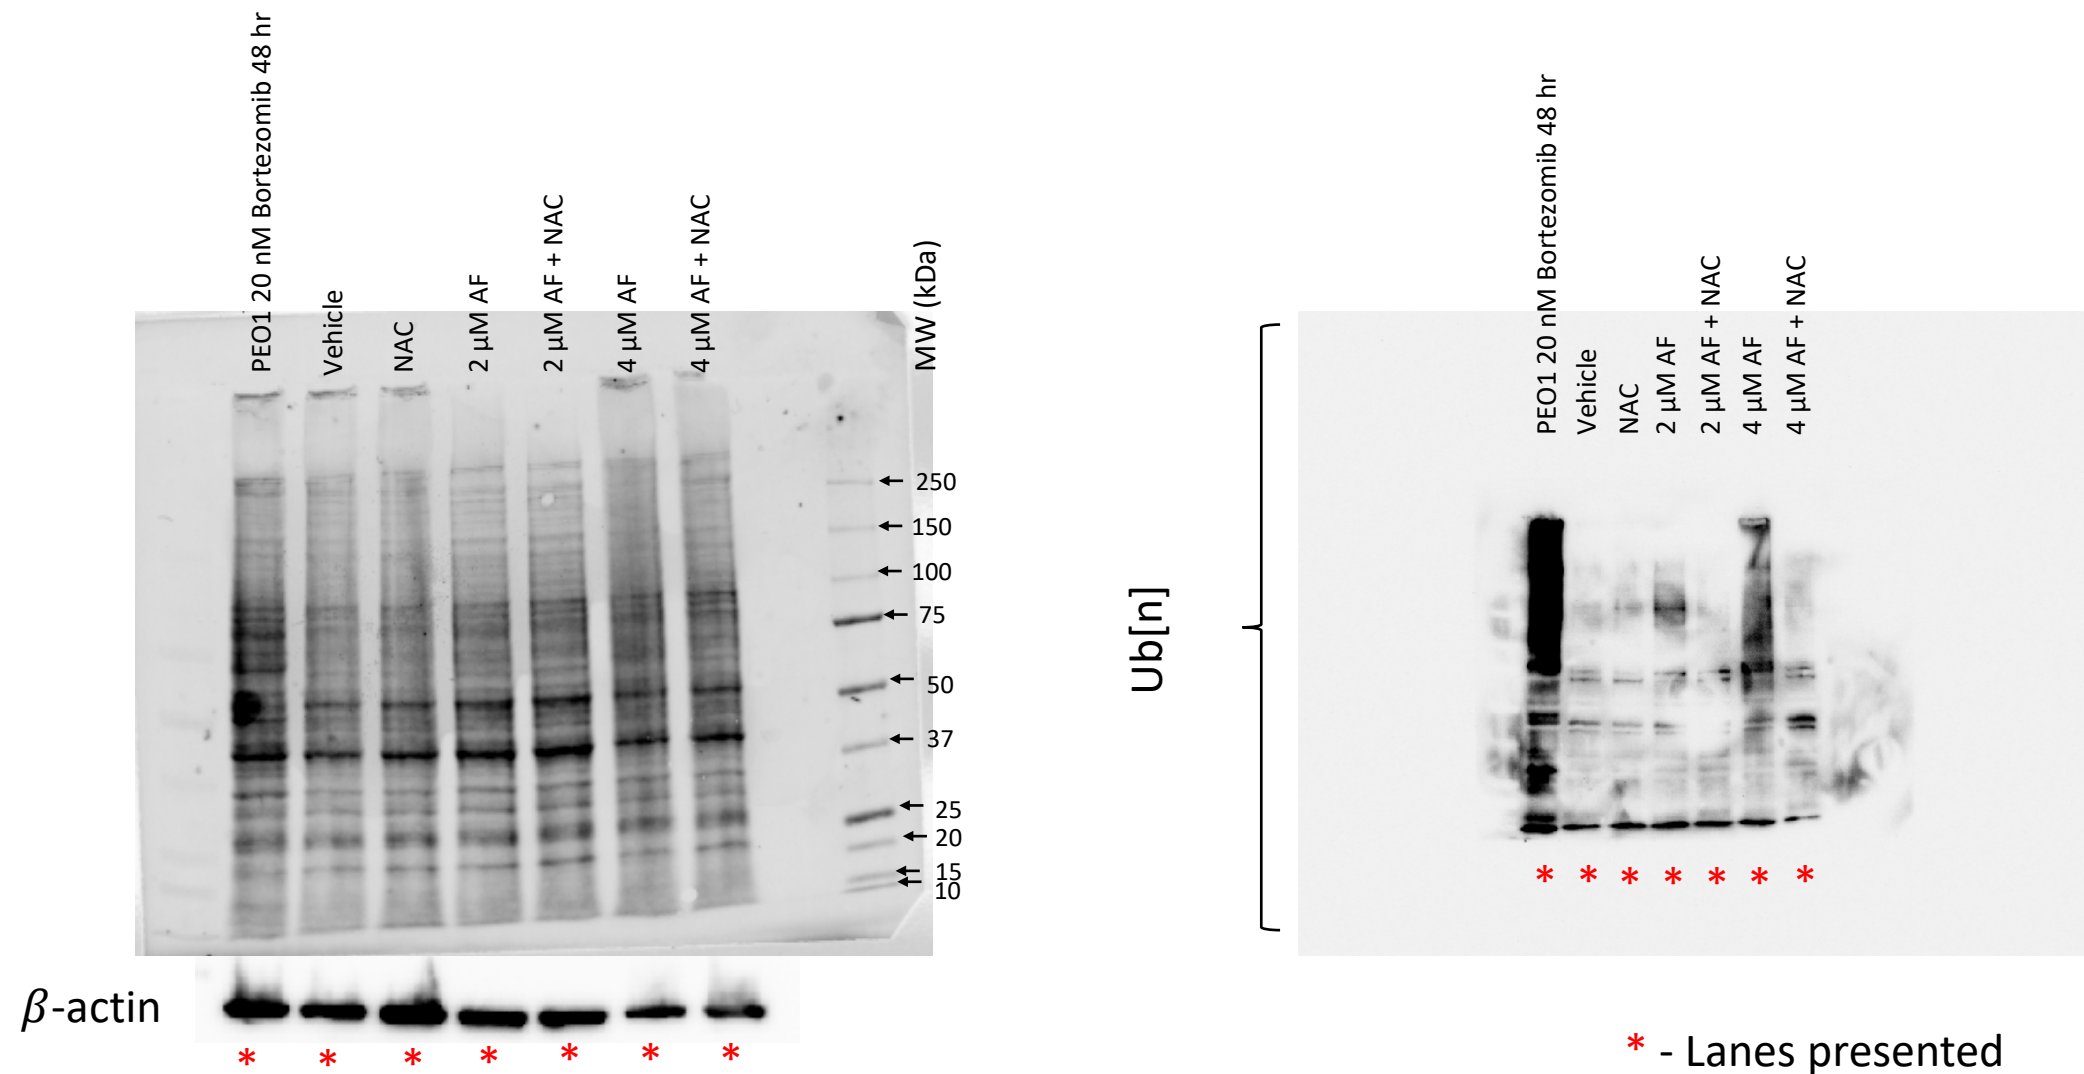

**Blot S3.** PEO1 cells were treated with the indicated concentrations of AF with or without the presence of 5 mM NAC for 24 hr. PEO1 cells treated with 20 nM bortezomib (Bz) for 48 hr were used as a positive control. Extracted proteins from the samples were run for 35 min at 200V on TGX stain free fast cast acrylamide gel (10 %). After the run, the gel was activated by UV light, and the proteins on the gel were transferred for 7 min using TransBlot Turbo. After the transfer, total protein load was visualized in the unstained membrane using BioRad ChemiDoc imager (A). After 1 h of blocking with 5% non-fat dry milk, the blot was incubated with anti-ubiquitin antibody overnight at 4°C. (B). The blot was then incubated for  $\beta$ -actin (A). Data from this blot was presented in Supplementary Figure S2.

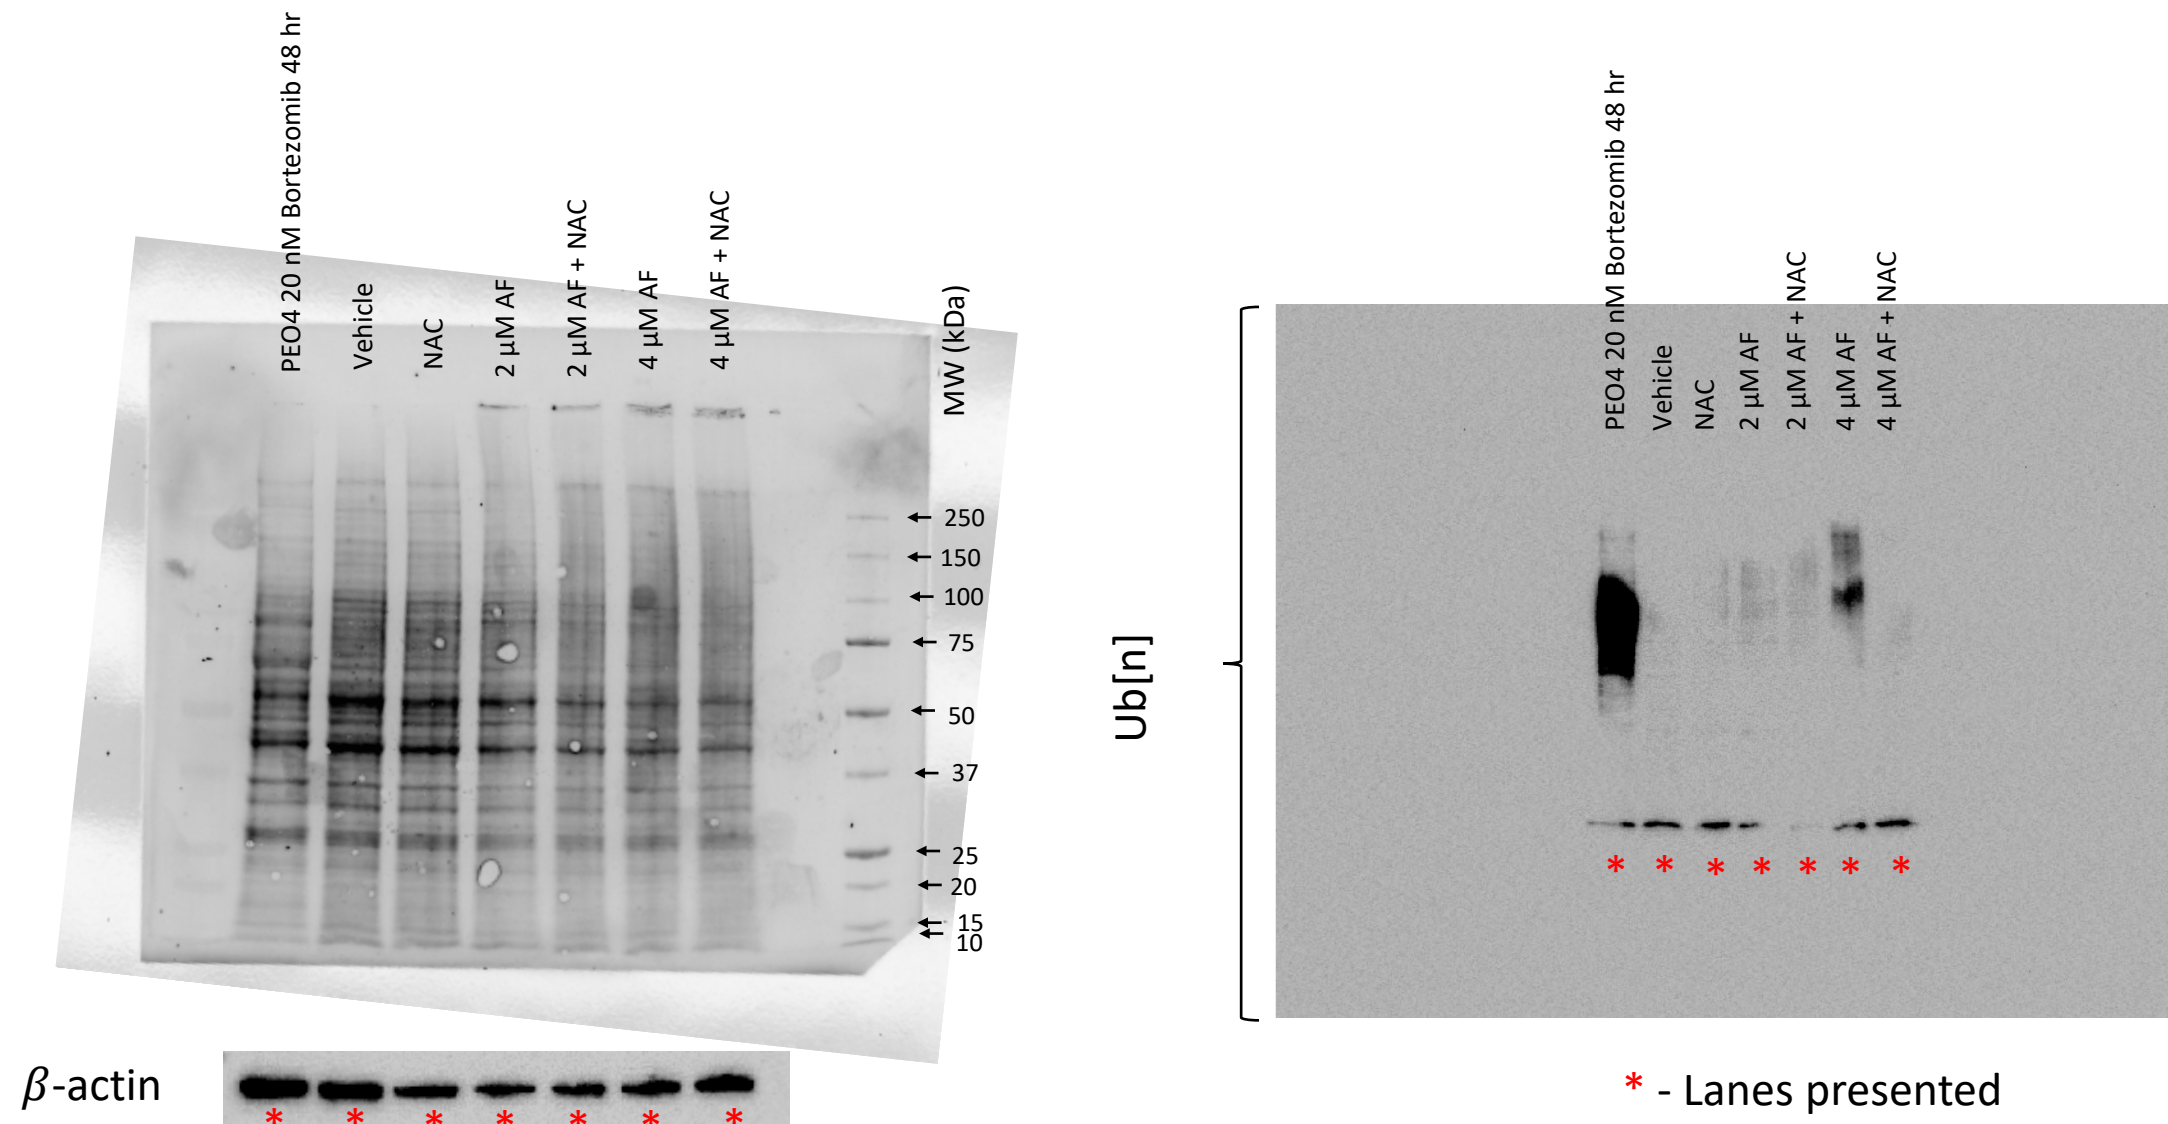

**Blot S4.** PEO4 cells were treated with the indicated concentrations of AF with or without the presence of 5 mM NAC for 24 hr. PEO4 cells treated with 20 nM bortezomib (Bz) for 48 hr were used as a positive control. Extracted proteins from the samples were run for 35 min at 200V on TGX stain free fast cast acrylamide gel (10%). After the run, the gel was activated by UV light, and the proteins on the gel were transferred for 7 min using TransBlot Turbo. After the transfer, total protein load was visualized in the unstained membrane using BioRad ChemiDoc imager (A). After 1 h of blocking with 5% non-fat dry milk, the blot was incubated with anti-ubiquitin antibody overnight at 4°C. (B). The blot was then incubated for  $\beta$ -actin (A). Data from this blot was presented in Supplementary Figure S2.
